# Supplementary material
Source: MDPI journal article supplement (https://www.mdpi.com/2073-4395/12/5/1035)
Supplement: s1 [file s1 › agronomy-1702888-supplementary.pdf]

Table S1 Display table of various diseases of different fruits

| Kind of fruit | Disease type                                                                        |                                                                                     |                                                                                      |                                                                                       |
|---------------|-------------------------------------------------------------------------------------|-------------------------------------------------------------------------------------|--------------------------------------------------------------------------------------|---------------------------------------------------------------------------------------|
| Apple         | 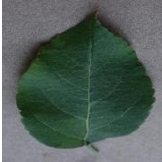   | 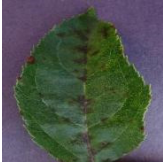   | 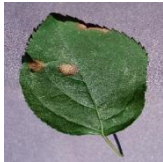   | 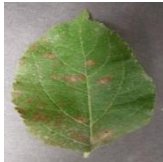   |
|               | healthy                                                                             | scab                                                                                | black rot                                                                            | Cedar Rust                                                                            |
|               | 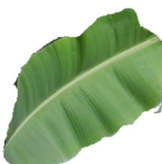   | 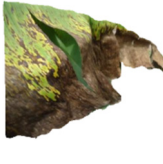   | 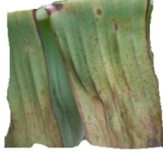   |                                                                                       |
|               | healthy                                                                             | Leaf spot                                                                           | Fusarium wilt                                                                        |                                                                                       |
| Blueberry     | 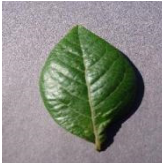  |                                                                                     |                                                                                      |                                                                                       |
|               | healthy                                                                             |                                                                                     |                                                                                      |                                                                                       |
| Cherry        | 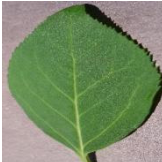 | 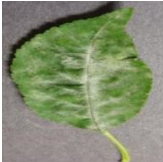 |                                                                                      |                                                                                       |
|               | healthy                                                                             | powdery mildew                                                                      |                                                                                      |                                                                                       |
| Grape         | 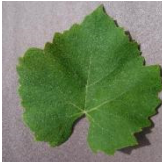 | 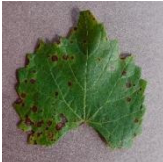 | 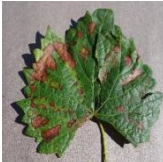 | 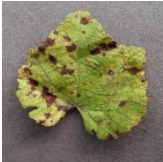 |
|               | healthy                                                                             | black rot                                                                           | black measles                                                                        | brown spot disease                                                                    |
| Guava         | 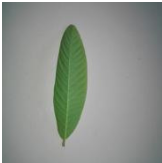 | 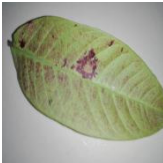 | 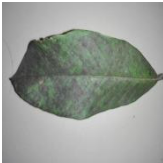 | 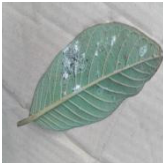 |
|               |                                                                                     |                                                                                     |                                                                                      |                                                                                       |
|               |                                                                                     |                                                                                     |                                                                                      |                                                                                       |
|               |                                                                                     |                                                                                     |                                                                                      |                                                                                       |

|            |                                                                                     |                                                                                     |                                                                                      |                                                                                       |                                                                                       |
|------------|-------------------------------------------------------------------------------------|-------------------------------------------------------------------------------------|--------------------------------------------------------------------------------------|---------------------------------------------------------------------------------------|---------------------------------------------------------------------------------------|
|            | healthy                                                                             | algal leaf spot                                                                     | Rust                                                                                 | Whitefly                                                                              |                                                                                       |
| Tangerine  | 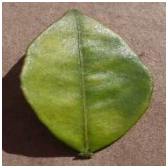   |                                                                                     |                                                                                      |                                                                                       |                                                                                       |
|            | Huanglongbing                                                                       |                                                                                     |                                                                                      |                                                                                       |                                                                                       |
| Peach      | 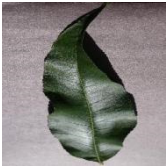   | 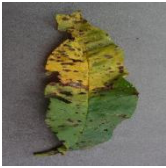   |                                                                                      |                                                                                       |                                                                                       |
|            | healthy                                                                             | scab                                                                                |                                                                                      |                                                                                       |                                                                                       |
| Raspberry  | 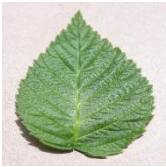  |                                                                                     |                                                                                      |                                                                                       |                                                                                       |
|            | healthy                                                                             |                                                                                     |                                                                                      |                                                                                       |                                                                                       |
| Strawberry | 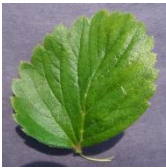 | 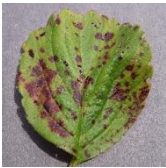 |                                                                                      |                                                                                       |                                                                                       |
|            | healthy                                                                             | leaf burn                                                                           |                                                                                      |                                                                                       |                                                                                       |
|            | 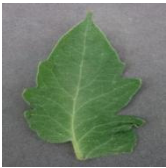 | 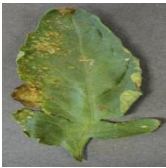 | 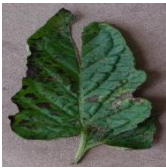 | 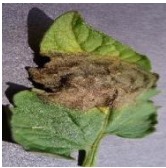 | 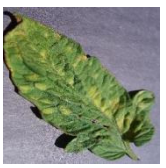 |
| Tomato     | healthy                                                                             | scab                                                                                | Early blight                                                                         | late blight                                                                           | Leaf mold                                                                             |
|            | 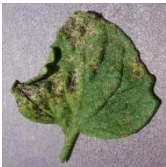 | 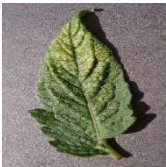 | 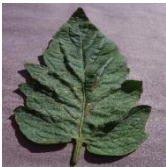 | 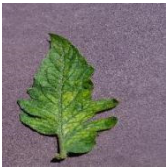 | 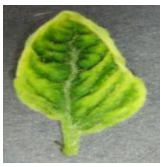 |
|            | Blight                                                                              | red spider damage                                                                   | target spot disease                                                                  | mosaic disease                                                                        | yellow leaf curl virus                                                                |

---

The code has been uploaded to GitHub for readers to use.

GitHub address: [https://github.com/13665832220/ResNet\\_CBAM.git](https://github.com/13665832220/ResNet_CBAM.git)
